# Supplementary material for: Combined Targeting of AKT and mTOR Inhibits Tumor Formation of EpCAM+ and CD90+ Human Hepatocellular Carcinoma Cells in an Orthotopic Mouse Model
Source: MDPI journal article supplement (doi:10.3390/cancers14081882), 2022-04-08
Supplement: s1 [file s1]

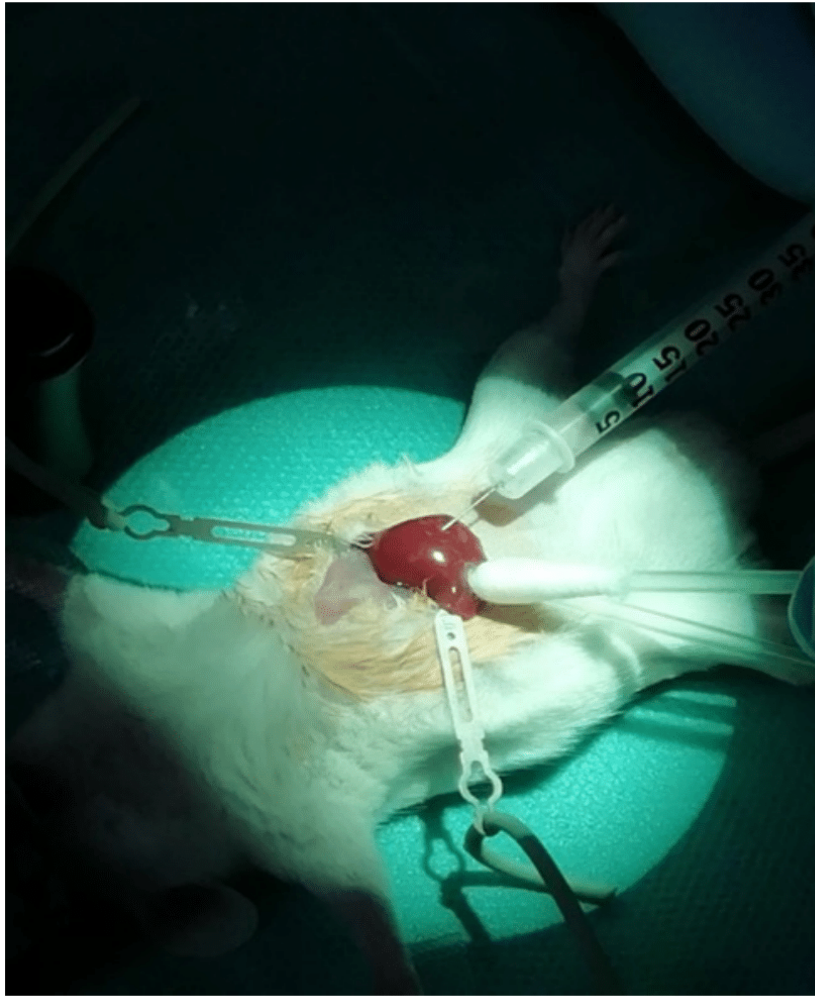

**Figure S1.** Implantation of human-derived HCC cells into the left lateral lobe of NSG-mouse liver parenchyma

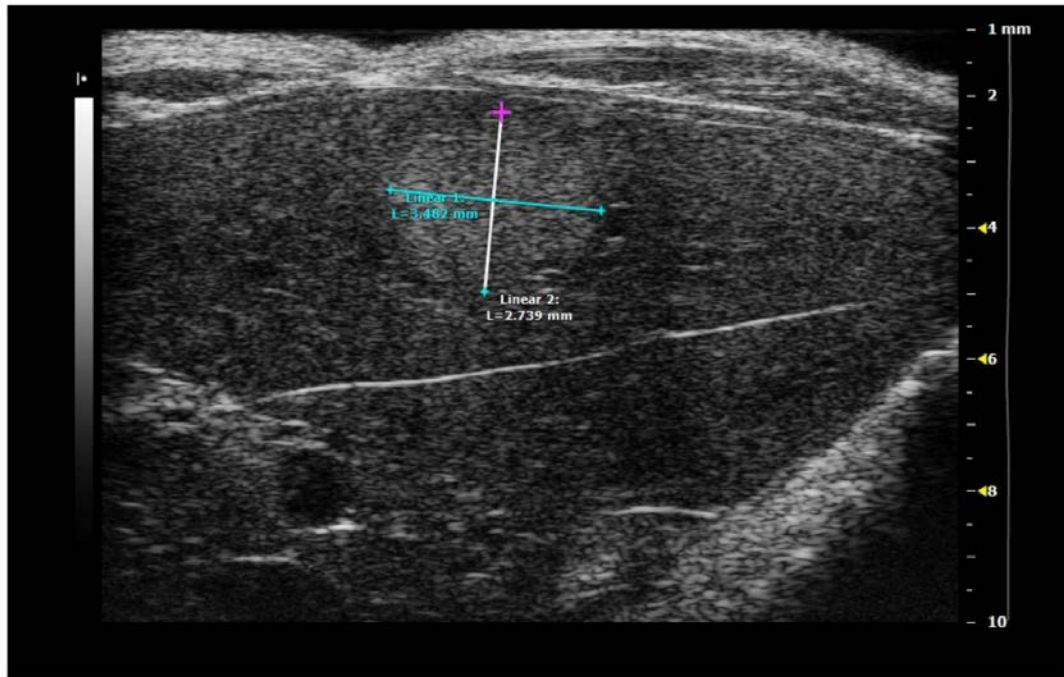

**Figure S2.** Abdominal sonography of NSG-mouse to detect liver parenchyma tumor growth and to measure its dimension after orthotopic injection of HCC cells

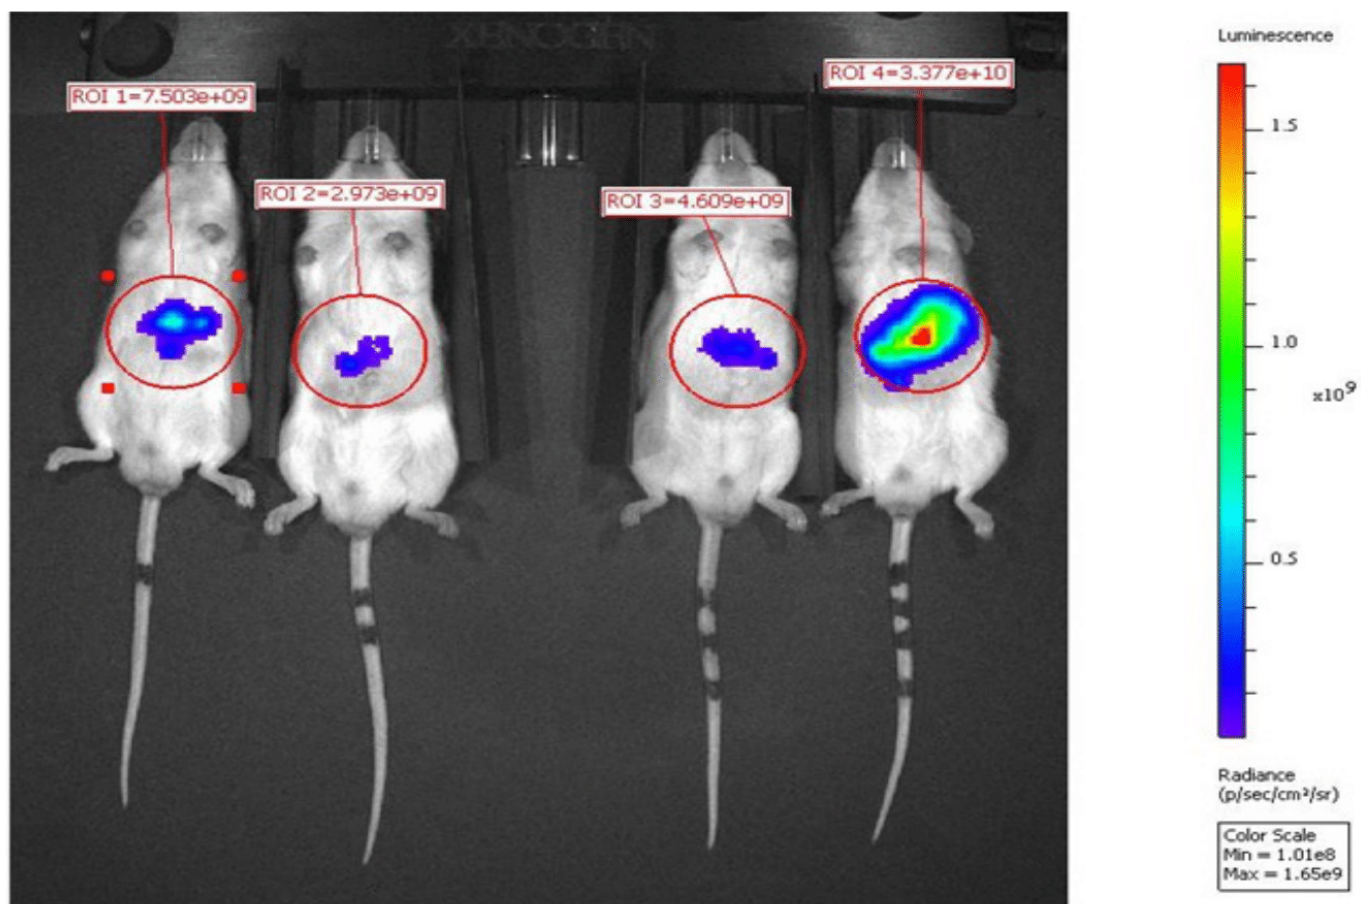

**Figure S3.** Bioluminescence screening to early detect tumor engraftment in the liver of NSG-mouse



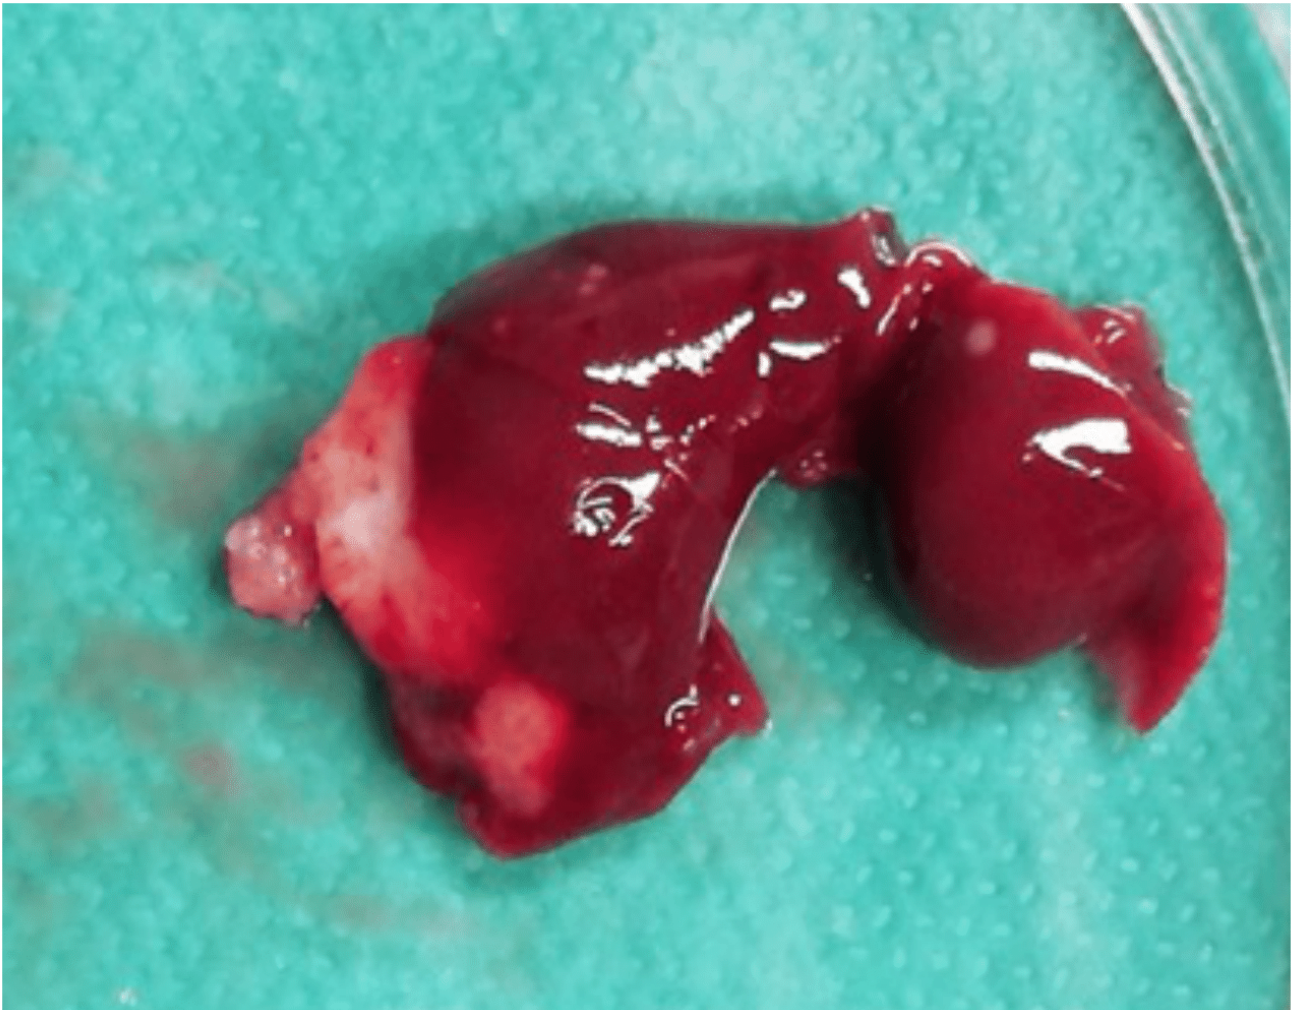

**Figure S4.** Harvested NSG-mouse liver showing tumor growth in the liver parenchyma

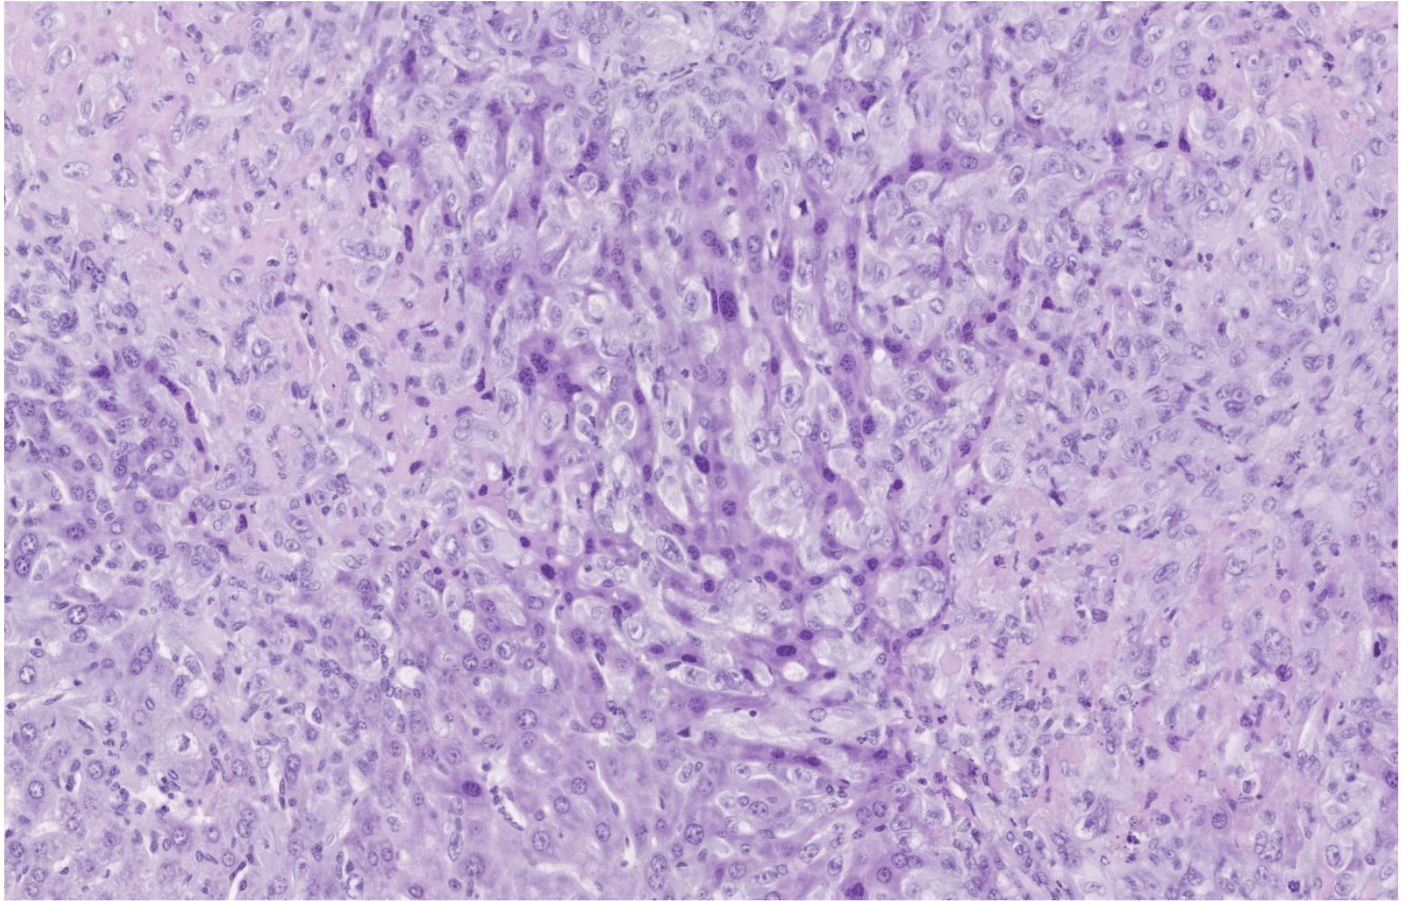

**Figure S5.** Histologic assessment of the liver specimens revealed infiltrates of malignant tumor cells with-out evident lineage. The tumor cells were mostly plump, partially spindled and showed highly pleomorphic nuclei with cleared chromatin and prominent nucleoli. Tumors were unencapsulated and showed a dissecting growth pattern between adjacent hepatocytes. The central aspects of the tumors showed large areas of necrosis. The morphologic findings are in keeping with prior descriptions of SK-HEP1 infiltrates



## C1 vs T3 STK

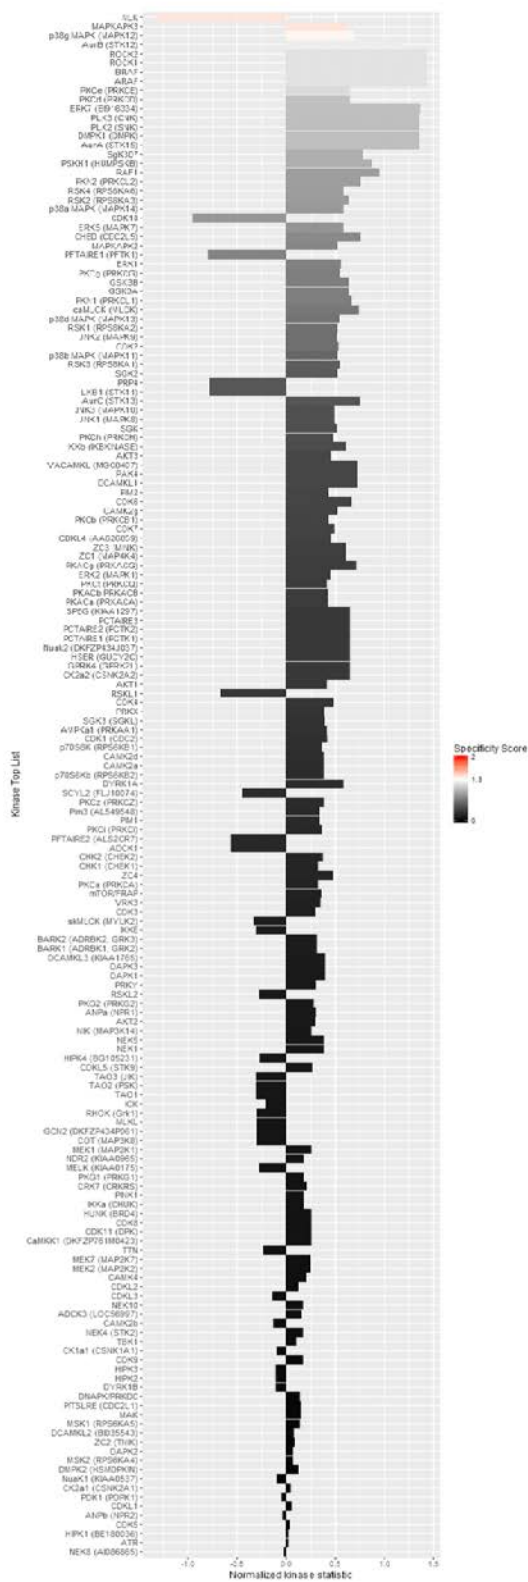

**Figure S6.** Complete list of up- or downregulated serine/threonine kinases of the third tumor from the treatment group (T3) in comparison with the first HCC-1 xenograft tumor of the control group (C1) after profiling using PamGene assays as described in Figure 3H

## C1 vs T3 PTK

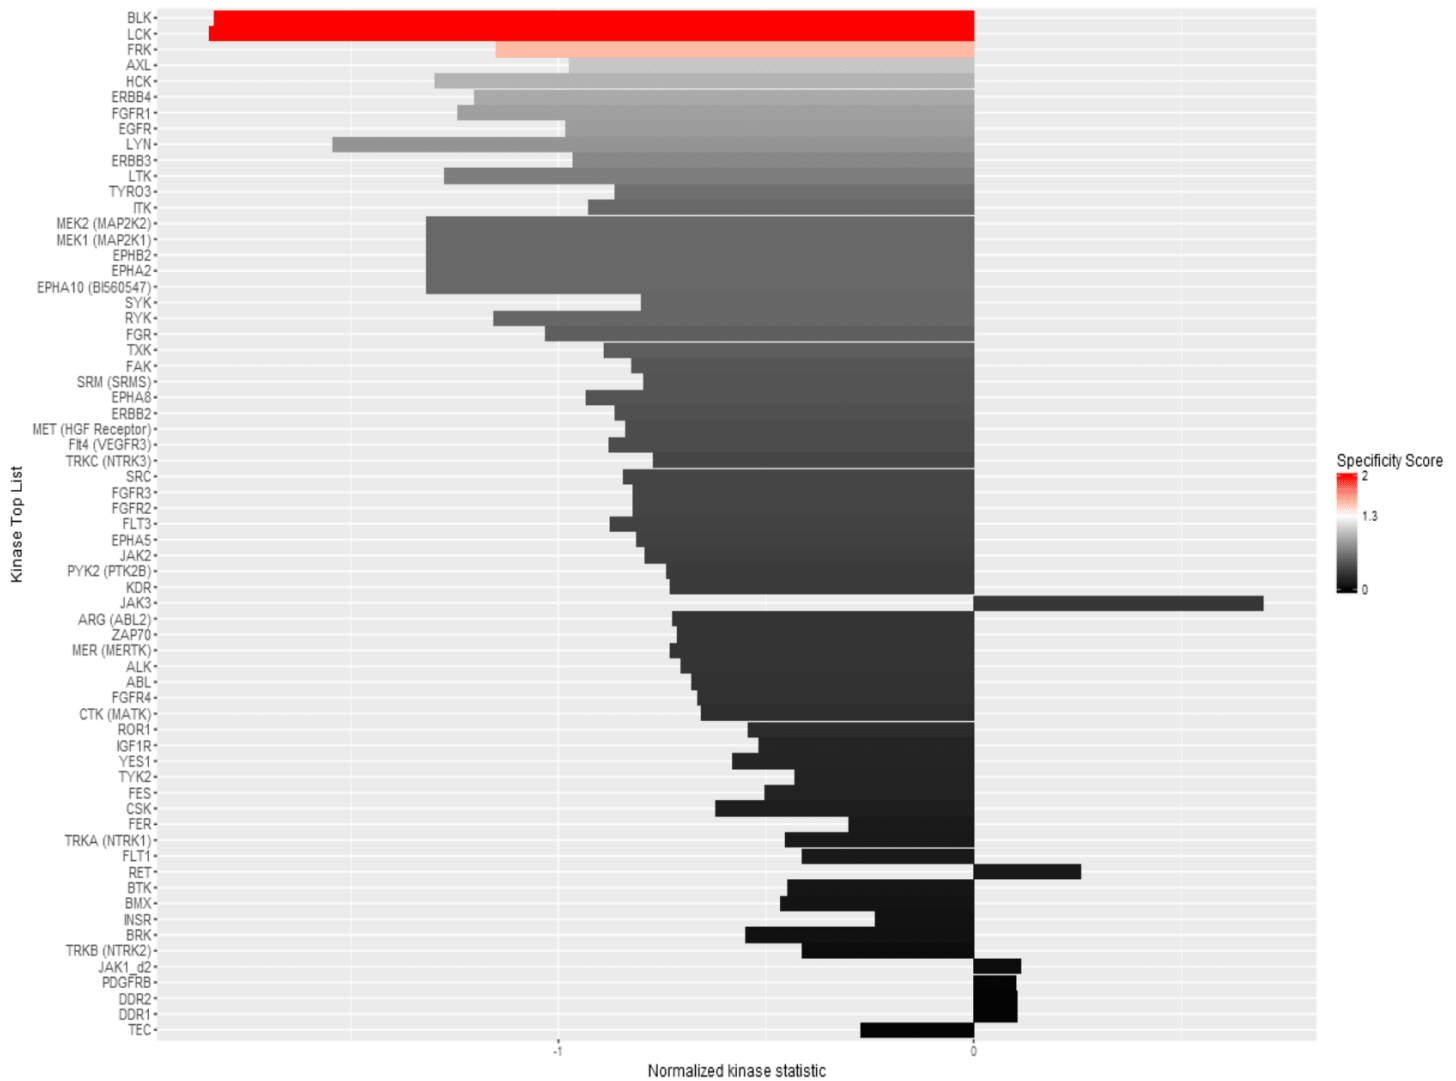

**Figure S7.** Complete list of up- or downregulated tyrosine kinases of the third tumor from the treatment group (T3) in comparison with the first HCC-1 xenograft tumor of the control group (C1) after profiling using PamGene assays as described in Figure 3I

Figure 2A

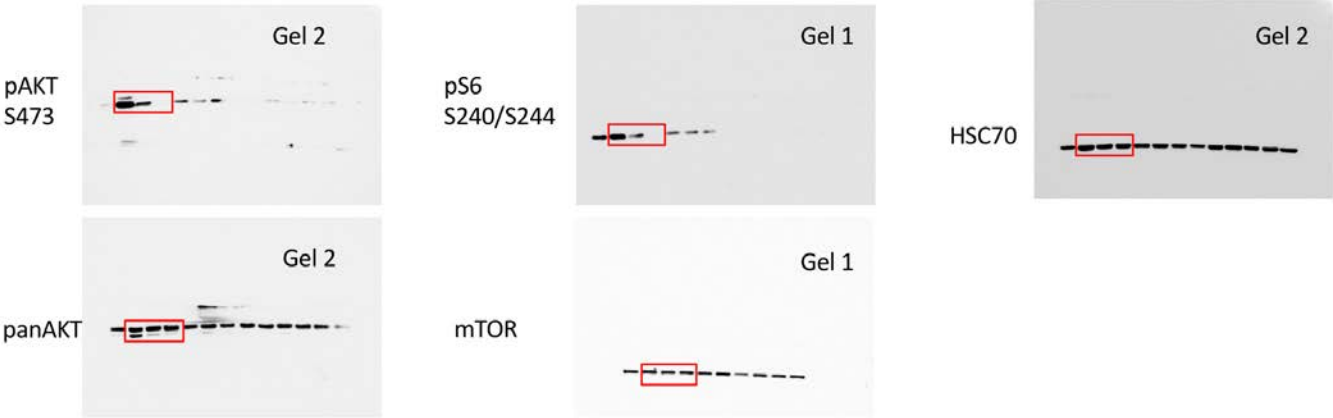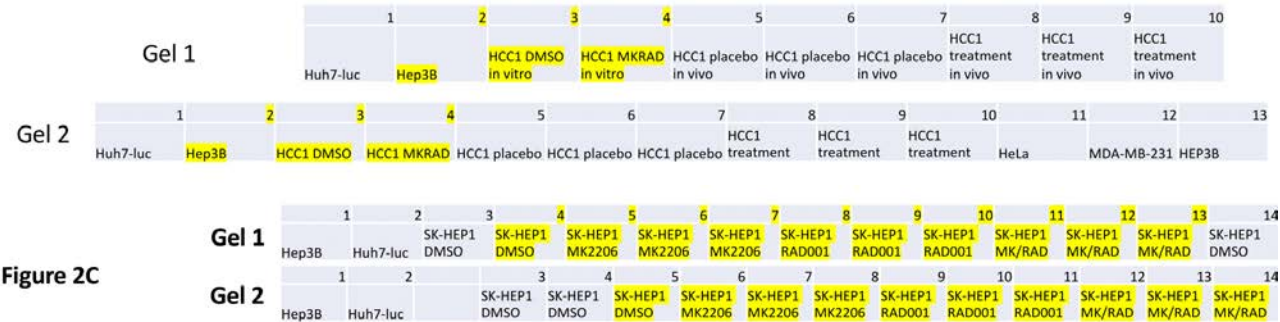

Figure 2C

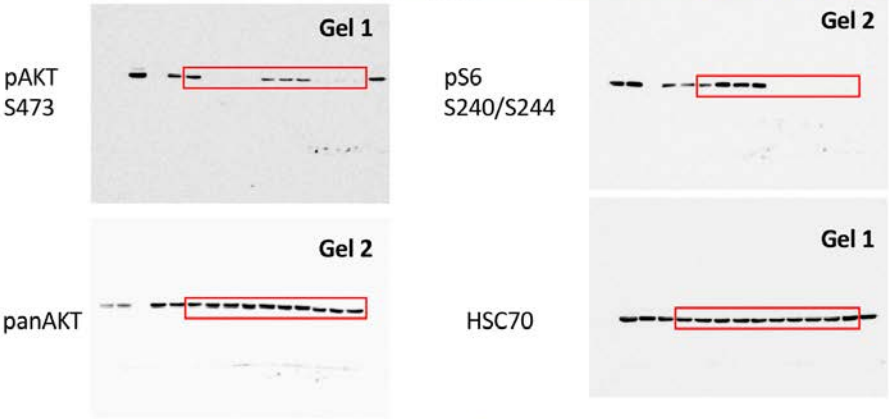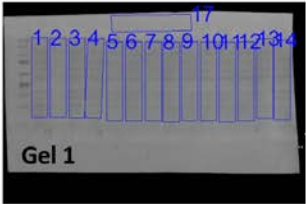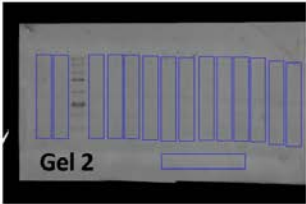



Figure 3B

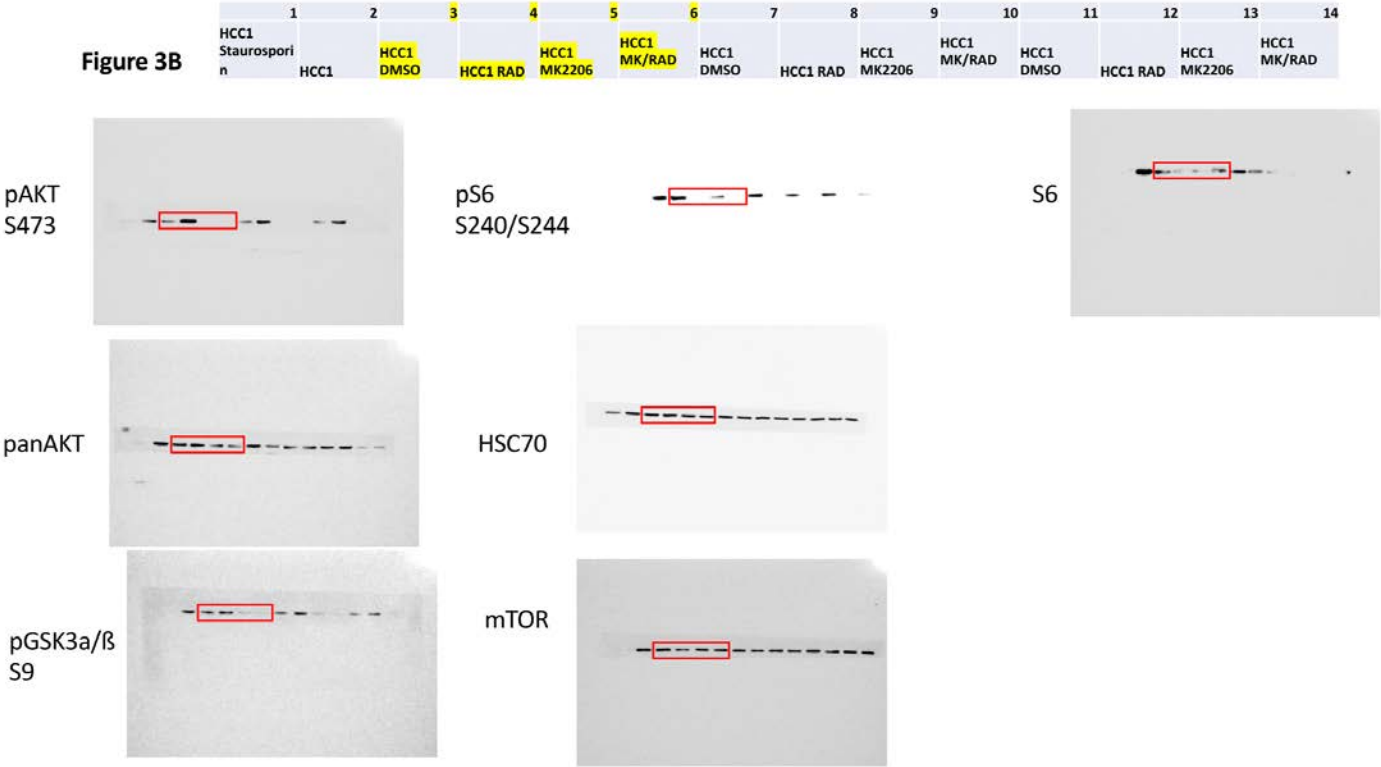

Figure 3E

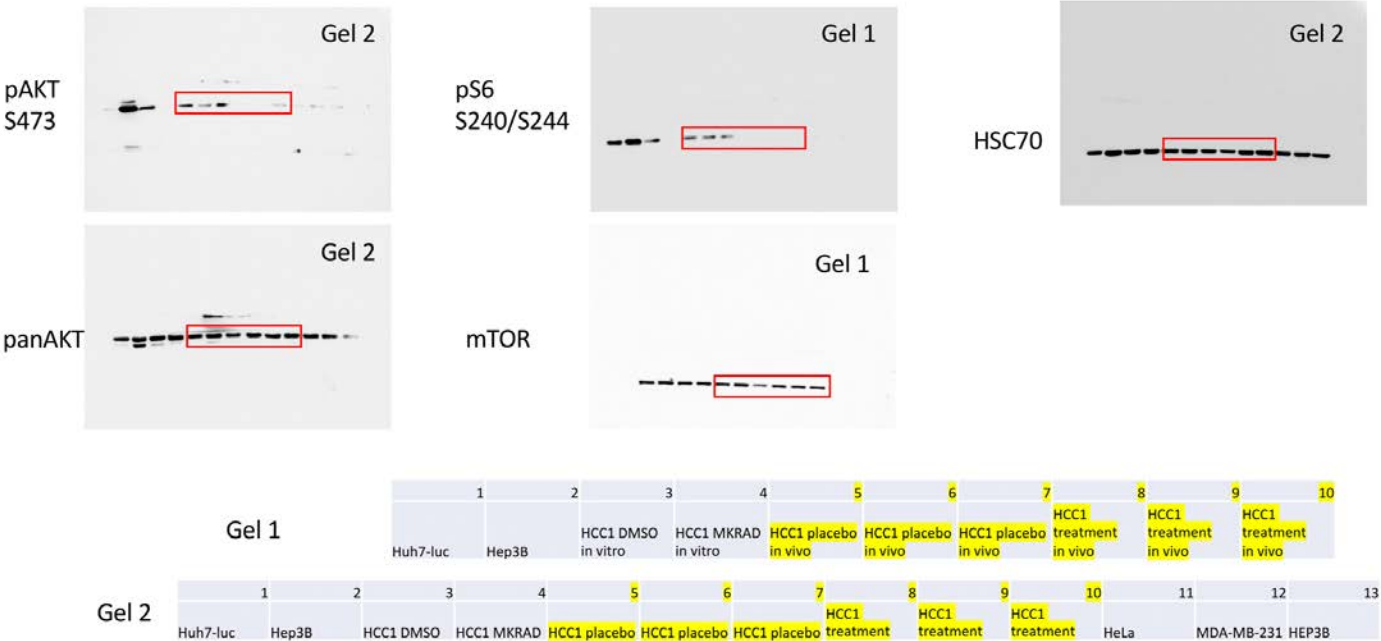

Figure 4E

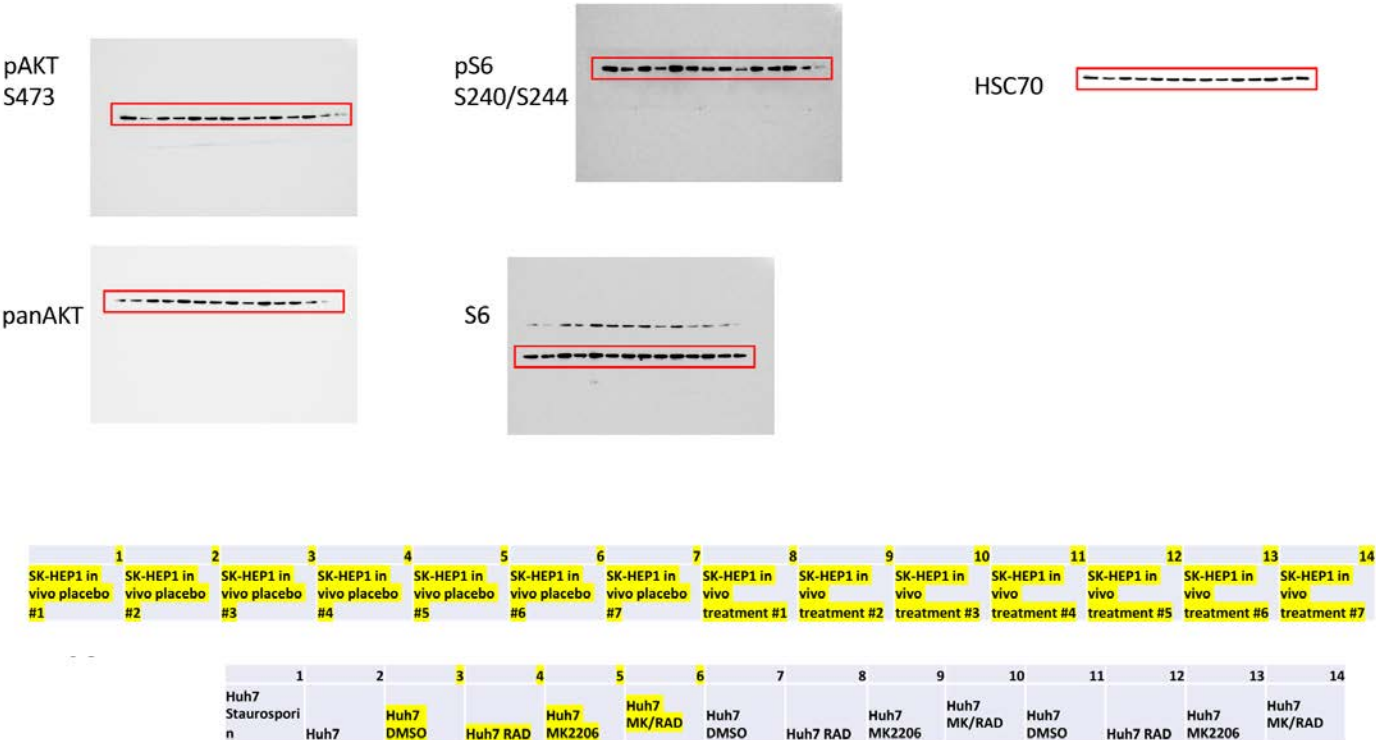

Figure 5A

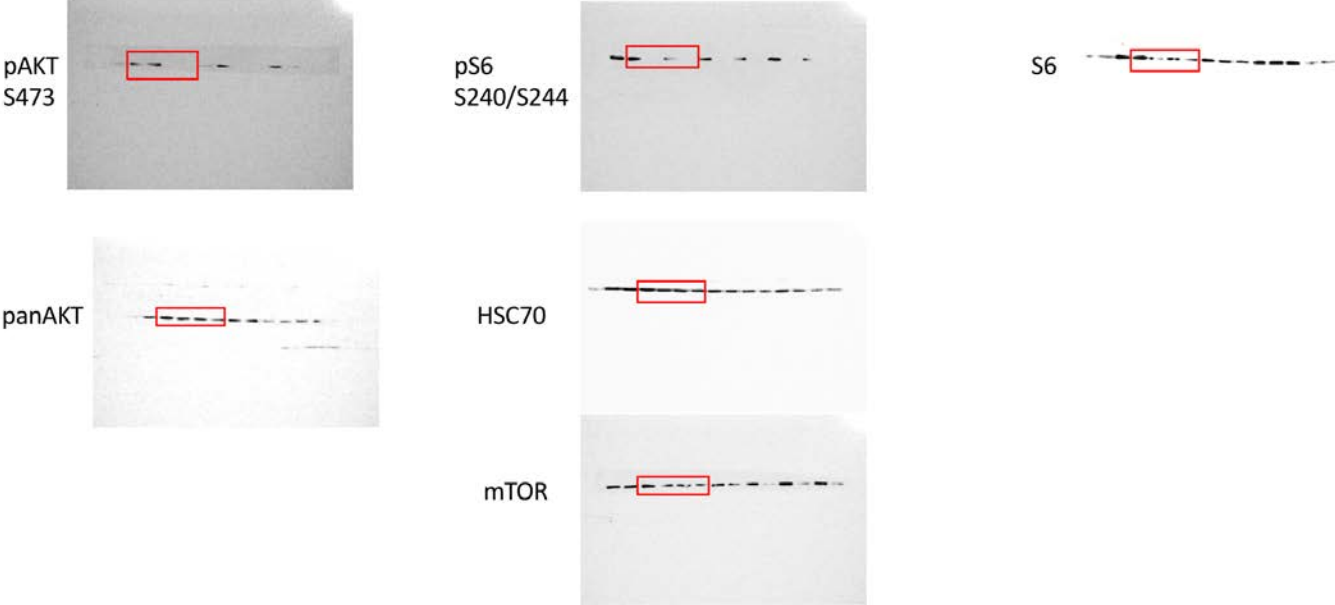

Figure 5D

pAKT  
S473

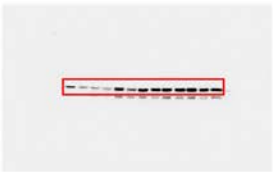

pS6  
S240/S244

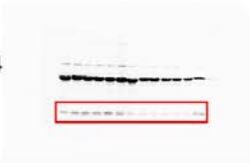

panAKT

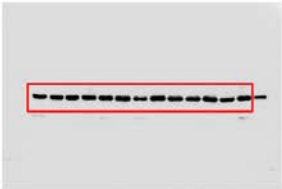

mTOR

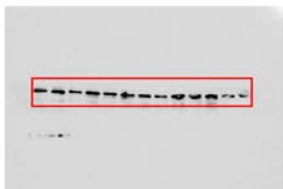

HSC70

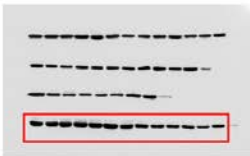

pGSK3a/β  
S9

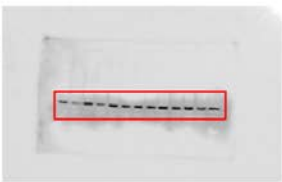

|  |         |         |         |         |         |         |         |         |         |         |         |         |      |      |
|--|---------|---------|---------|---------|---------|---------|---------|---------|---------|---------|---------|---------|------|------|
|  | 1       | 2       | 3       | 4       | 5       | 6       | 7       | 8       | 9       | 10      | 11      | 12      | 13   | 14   |
|  | Placeb  | Placeb  | Placeb  | Placeb  | Placeb  | Placeb  | Treatm  | Treatm  | Treatm  | Treatm  | Treatm  | Treatm  |      | MDA- |
|  | o Huh7  | ent     | ent     | ent     | ent     | ent     | ent     |      | MB-  |
|  | in vivo | DMSO | 231  |
|  | #32     | #34     | #35     | #36     | #53     | #55     | #37     | #39     | #40     | #41     | #47     | #52     |      |      |

Figure 5E

Controls

Treatment

pAKT  
S473

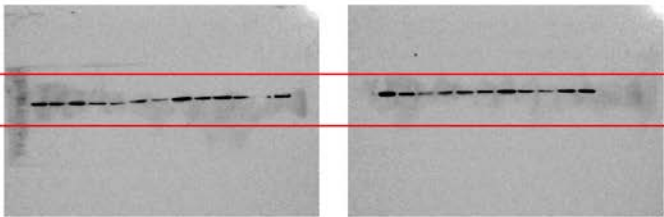

pS6  
S240/S244

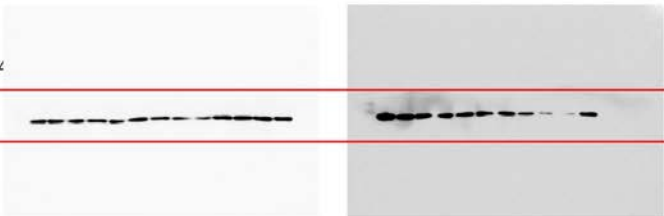

HSC70

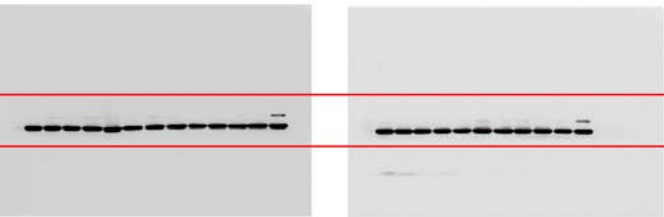

Controls:

|  |     |     |     |     |     |     |     |     |     |     |     |     |     |       |         |
|--|-----|-----|-----|-----|-----|-----|-----|-----|-----|-----|-----|-----|-----|-------|---------|
|  | 1   | 2   | 3   | 4   | 5   | 6   | 7   | 8   | 9   | 10  | 11  | 12  | 13  | 14    | *       |
|  | 31  | 32  | 31  | 32  | 33  | 34  | 35  | 43  | 44  | 53  | 54  | 55  | DMS | MDA-  | only on |
|  | LLL | LML | RML | O   | MB-   | panAKT  |
|  |     |     |     |     |     |     |     |     |     |     |     |     |     | 231 * | blots)  |

Treatment:

|  |        |        |        |        |        |        |        |        |        |        |      |        |
|--|--------|--------|--------|--------|--------|--------|--------|--------|--------|--------|------|--------|
|  | 1      | 2      | 3      | 4      | 5      | 6      | 7      | 8      | 9      | 10     | 11   | 12     |
|  | 37 RML | 38 RML | 39 RML | 40 RML | 41 RML | 42 RML | 46 RML | 47 RML | 48 RML | 52 RML | DMSO |        |
|  |        |        |        |        |        |        |        |        |        |        |      | MDA-   |
|  |        |        |        |        |        |        |        |        |        |        |      | MB-231 |
|  |        |        |        |        |        |        |        |        |        |        |      | *      |

Controls

Treatment

panAKT

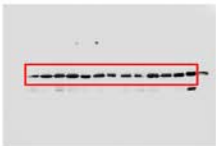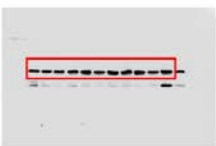

mTOR

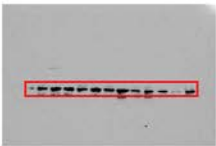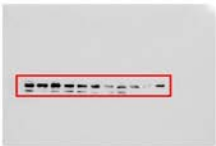

Figure 5F

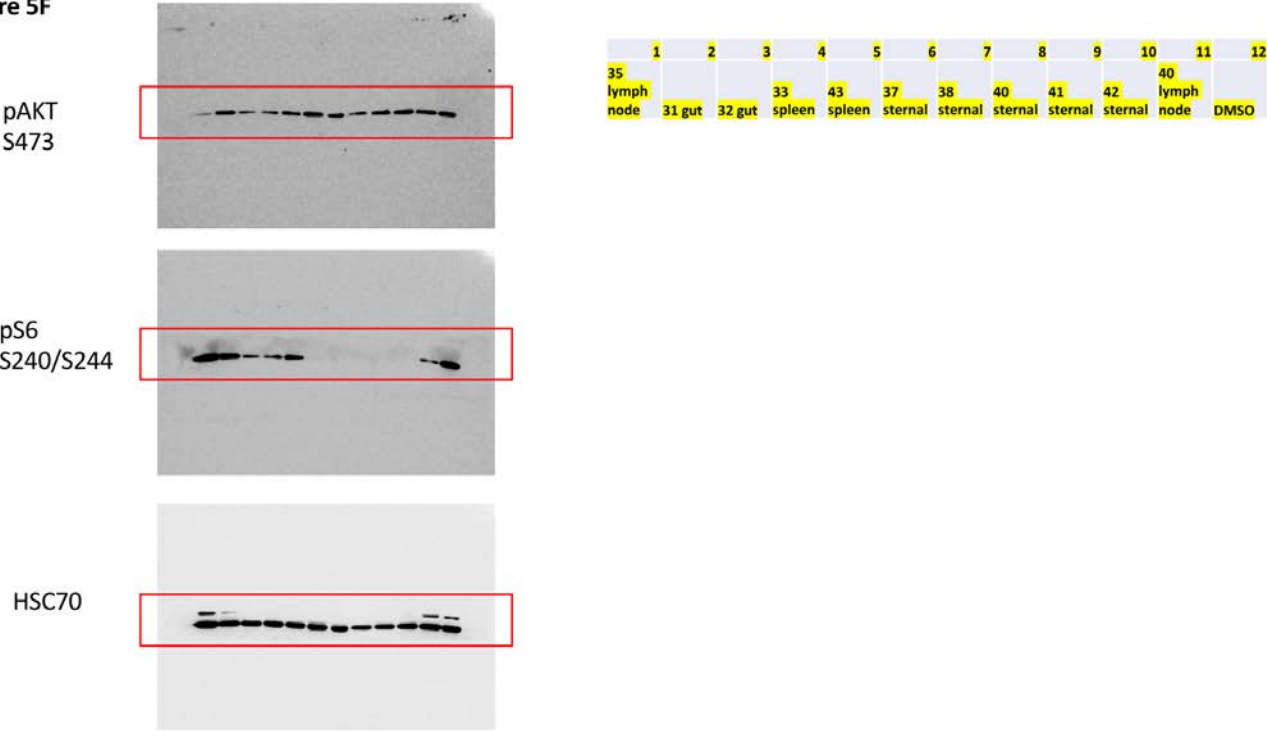

Figure S8. Original uncropped Western blots.
